# Supplementary material for: Prognostic Immunophenotyping Clusters of Clear Cell Renal Cell Carcinoma Defined by the Unique Tumor Immune Microenvironment
Source: PubMed Central journal article supplement (PMC8685518; doi:10.3389/fcell.2021.785410), 2021-12-06

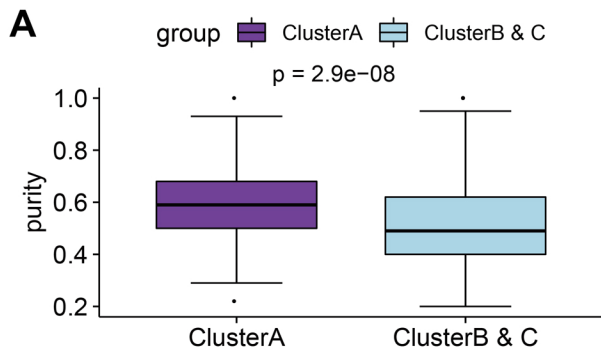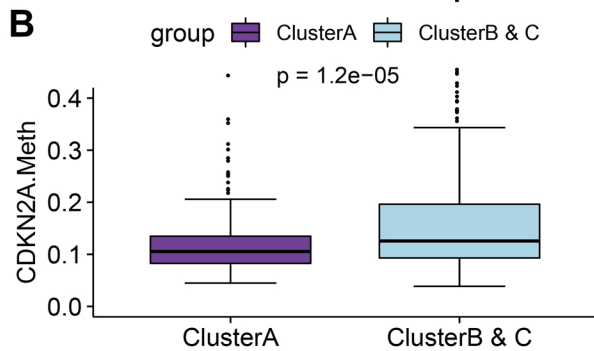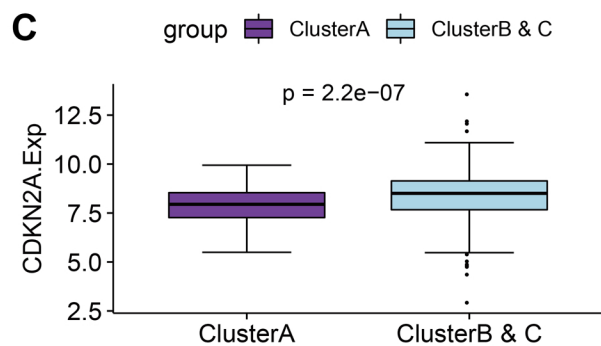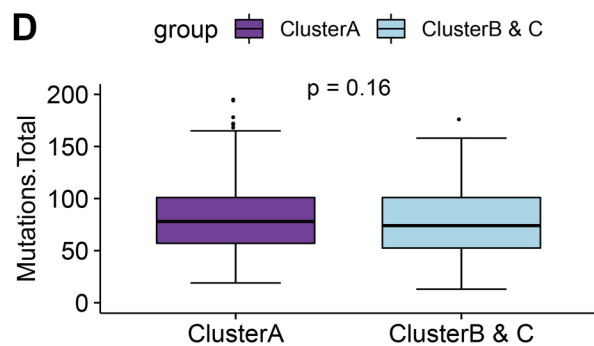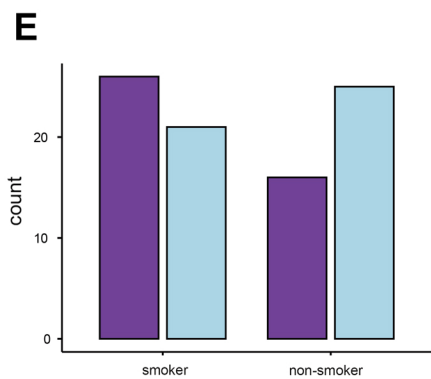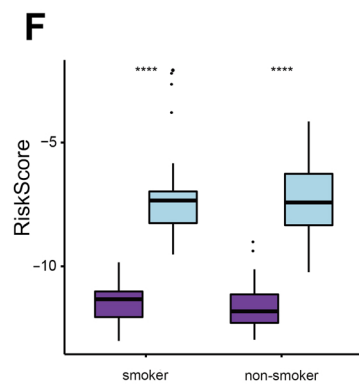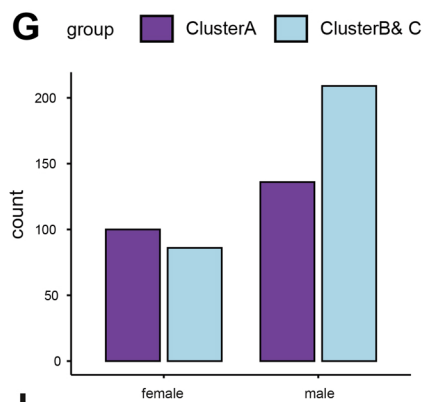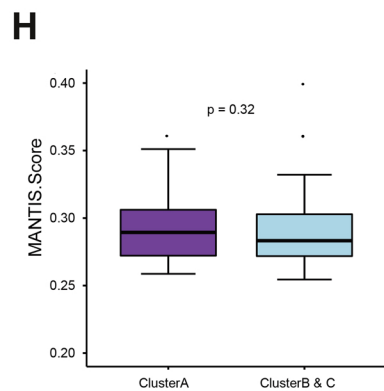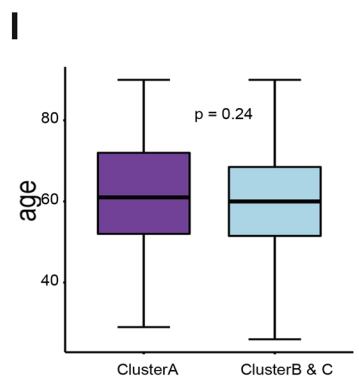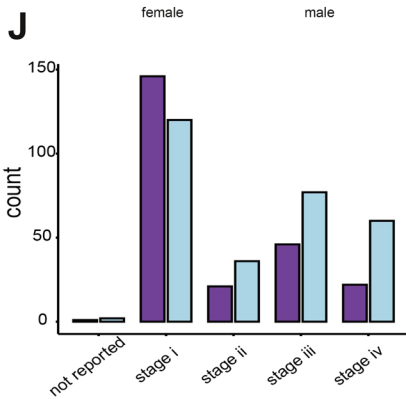

Supplement: Image2.pdf [file Image2.pdf]
