# Supplementary material for: Prognostic Immunophenotyping Clusters of Clear Cell Renal Cell Carcinoma Defined by the Unique Tumor Immune Microenvironment
Source: PubMed Central journal article supplement (PMC8685518; doi:10.3389/fcell.2021.785410), 2021-12-06
Supplement: Image3.pdf [file Image3.pdf]

B cells memory

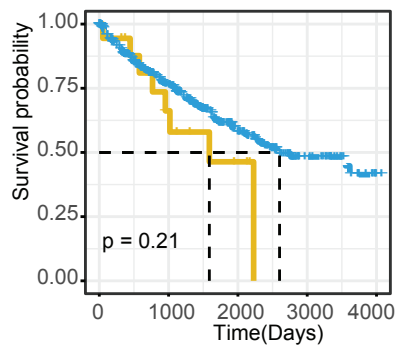

Plasma cells

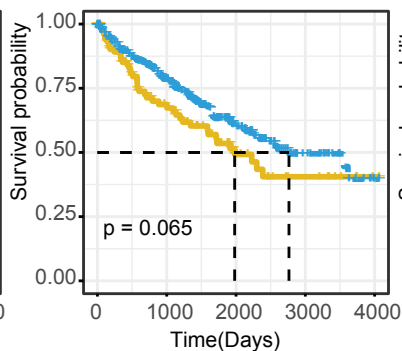

T cells CD8

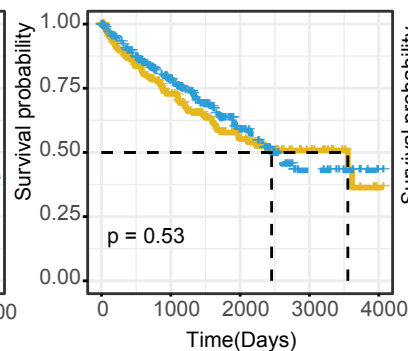

T cells CD4 memory resting

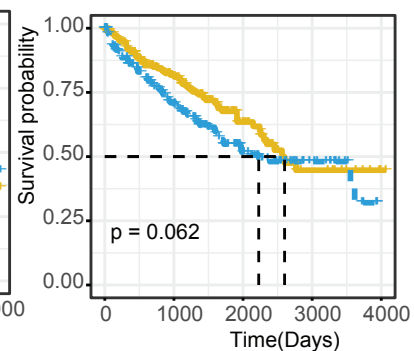

Strata High Low

T cells CD4 memory activated

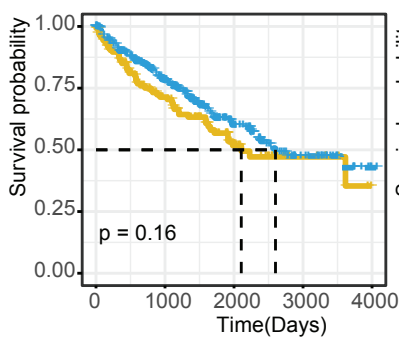

T cells follicular helper

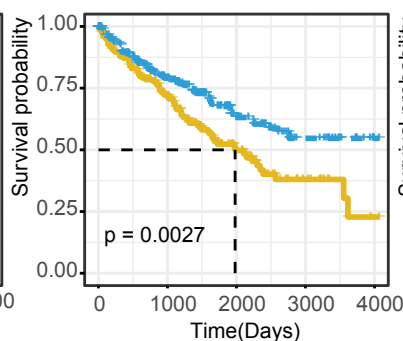

T cells regulatory (Tregs)

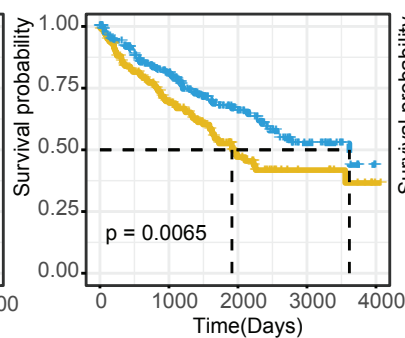

T cells gamma delta

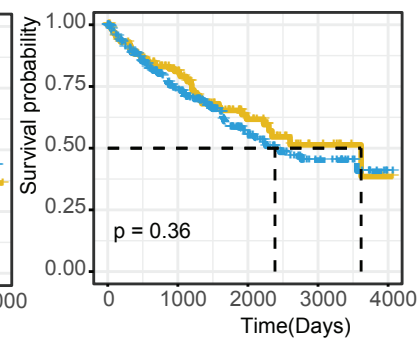

NK cells resting

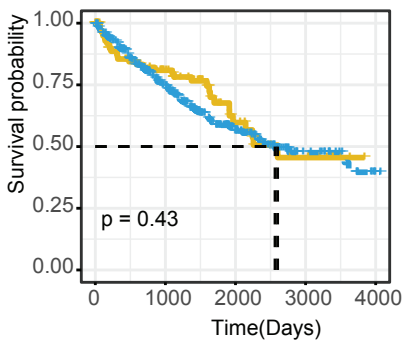

Macrophages M2

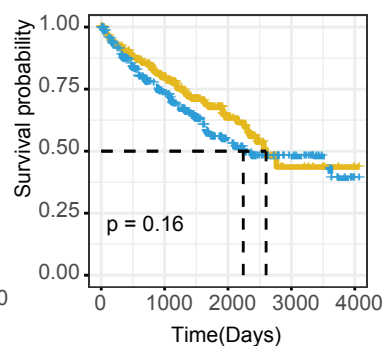

Dendritic cells resting

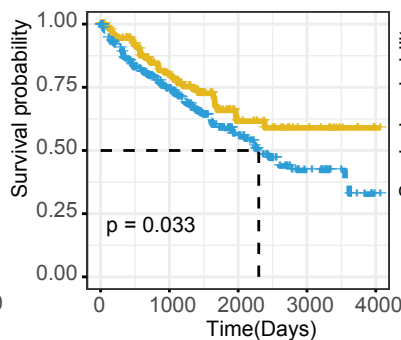

Dendritic cells activated

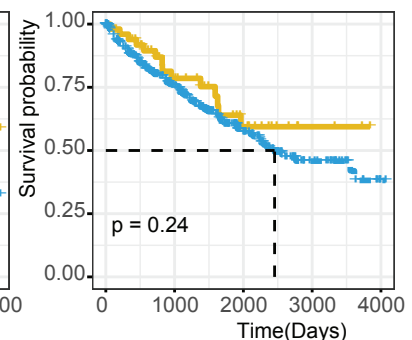

Mast cells resting

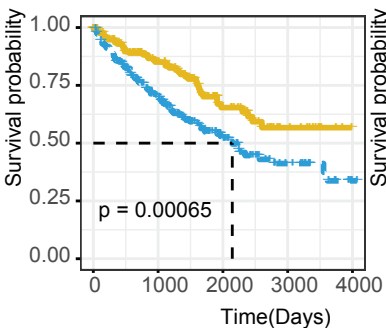

Mast cells activated

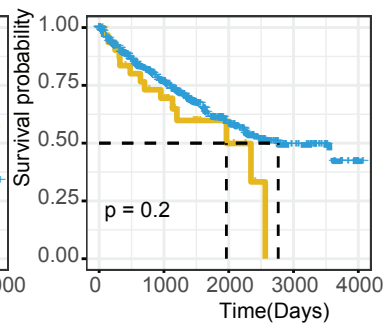

Neutrophils

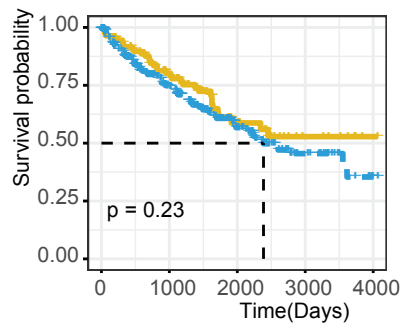

High infiltration

Low infiltration
